# Supplementary material for: The Role of Horizontal Gene Transfer in the Evolution of the Oomycetes
Source: PLoS Pathog. 2015 May 28;11(5):e1004805. doi: 10.1371/journal.ppat.1004805 (PMC4447370; doi:10.1371/journal.ppat.1004805)
Supplement: S2 Table — (XLSX) [file ppat.1004805.s002.xlsx]

## Sheet: Sheet1
Publications demonstrating HGT into Oomycetes
Belbahri L, Calmin G, Mauch F, Andersson JO (2008) Evolution of the cutinase gene family: evidence for lateral gene transfer of a candidate Phytophthora virulence factor. Gene 408: 1-8.
Gijzen M, Nürnberger MT (2006) Nep1-like proteins from plant pathogens: recruitment and diversification of the NPP1 domain across taxa. Phytochem 67(16): 1800-1807.
Jiang RH, de Bruijn I, Haas BJ, Belmonte R, Löbach L, et al. (2013) Distinctive expansion of potential virulence genes in the genome of the oomycete fish pathogen Saprolegnia parasitica. PLoS Genet 9: e1003272.
Lévesque CA, Brouwer H, Cano L, Hamilton JP, Holt C, et al. (2010) Genome sequence of the necrotrophic plant pathogen Pythium ultimum reveals original pathogenicity mechanisms and effector repertoire. Genome Biol 11: R73.
Luis P, Gauthier A, Trouvelot S, Poinssot B, Frettinger P (2013) Identification of Plasmopara viticola genes potentially involved in pathogenesis on grapevine suggests new similarities between oomycetes and true fungi. Phytopathol 103(10): 1035-1044.
Misner I, Blouin N, Leonard G, Richards TA, Lane CE (2014) The secreted proteins of Achlya hypogyna and Thraustotheca clavata identify the ancestral oomycete secretome and reveal gene acquisitions by horizontal gene transfer. Genome Biology and Evolution.
Morris PF, Schlosser LR, Onasch KD, Wittenschlaeger T, Austin R, et al. (2009) Multiple horizontal gene transfer events and domain fusions have created novel regulatory and metabolic networks in the oomycete genome. PLoS One 4: e6133.
Reiss K, Kirchner E, Gijzen M, Zocher G, Löffelhardt B, et al. (2011) Structural and phylogenetic analyses of the GP42 transglutaminase from Phytophthora sojae reveal an evolutionary relationship between oomycetes and marine Vibrio bacteria. J Biol Chem 286: 42585-42593.
Richards TA, Soanes DM, Jones MD, Vasieva O, Leonard G, et al. (2011) Horizontal gene transfer facilitated the evolution of plant parasitic mechanisms in the oomycetes. Proc Natl Acad Sci USA 108: 15258-15263.
Torto TA, Rauser L, Kamoun S (2002) The pipg1 gene of the oomycete Phytophthora infestans encodes a fungal-like endopolygalacturonase. Curr Genet 40: 385-390
Whitaker JW, McConkey GA, Westhead DR (2009) The transferome of metabolic genes explored: analysis of the horizontal transfer of enzyme encoding genes in unicellular eukaryotes. Genome Biol. 10: R36.
